# Supplementary material for: El Tribunal del Cannabis desnuda al emperador
Source: Hindawi journal article supplement (doi:10.1155/2022/8808677), 2009-01-01
Supplement: f1 [file 8808677.f1.pdf]

## Supplementary material

**Table S1 The total mortality and exclusion rates of experimental mice**

| <b>Group</b>           | <b>Mortality Rate</b> | <b>Excluded</b> |
|------------------------|-----------------------|-----------------|
| <b>Experiment 1</b>    |                       |                 |
| Sham                   | 0.00% (0/12)          | 0               |
| SAH                    | 16.67%(3/18)          | 3               |
| SAH+ Vehicle           | 20%(2/10)             | 2               |
| SAH+ Ferrostatin-1     | 18.18%(2/11)          | 3               |
| <b>Experiment 2</b>    |                       |                 |
| Sham                   | 0.00%(0/24)           | 0               |
| SAH                    | 21.43%(11/42)         | 7               |
| SAH+ Vector            | 22.22%(10/45)         | 5               |
| SAH+ AAV-AQP4          | 15%(6/40)             | 4               |
| <b>Experiment 3</b>    |                       |                 |
| SAH+ Vector            | 27.27%(3/11)          | 2               |
| SAH+ AAV-AQP4          | 20%(2/10)             | 2               |
| SAH+ AAV-AQP4+ Vehicle | 30%(3/10)             | 1               |
| SAH+ AAV-AQP4+ Fer-1   | 22.22%(2/9)           | 1               |
| <b>Experiment 4</b>    |                       |                 |
| Vector                 | 25%(2/8)              | 0               |
| AAV-AQP4               | 14.29%(1/7)           | 0               |
| <b>Total</b>           | <b>18.29%(47/257)</b> | <b>30</b>       |

---

|             |                |    |
|-------------|----------------|----|
| <b>Sham</b> | 0.00%(0/36)    | 0  |
| <b>SAH</b>  | 21.36%(44/206) | 30 |

---

**Table S2 Detailed AQP4 overexpression adeno-associated virus information**

**Final sequence:**

---

TGAGGGGAGCTCTCCCATAGCTGGGCTGCGGCCCAACCCACCCCT  
CAGGCTATGCCAGGGGGTGTGCCAGGGGCACCCGGGCATCGCCAGTCTA  
GCCACTCCTTCATAAAGCCCTCGCATCCCAGGAGCGAGCAGAGCCAGAG  
CAGGTTGGAGAGGAGACGCATCACCTCCGCTGCTCGCCGGGATCCGCCA  
CCATGAGTGACAGAGCTGCGGCAAGGCGGTGGGGTAAGTGTGGACATTCC  
TGCAGTAGAGAGAGCATCATGGTGGCTTTCAAAGGAGTCTGGACTCAGGC  
TTTCTGGAAGGCAGTCTCAGCAGAATTTCTGGCCACGCTTATCTTTGTTTTG  
CTCGGTGTGGGATCCACCATAAACTGGGGTGGCTCAGAAAACCCCTTACCT  
GTGGACATGGTCCTCATCTCCCTTTGCTTTGGACTCAGCATTGCTACCATGG  
TGCAGTGCTTTGGCCACATCAGTGGTGGCCACATCAATCCCGCTGTGACTG  
TAGCCATGGTGTGCACACGAAAGATCAGCATCGCTAAGTCCGTCTTCTACA  
TCATTGCACAGTGCCTGGGGGCCATCATTGGAGCCGGCATCCTCTACCTGG  
TCACACCTCCAGTGTGGTTGGAGGATTGGGAGTCACCACGGTTCATGGA  
AACCTCACCGCTGGCCATGGGCTCCTGGTGGAGTTAATAATACTTTCCAG  
TTGGTGTTCACTATTTTTGCCAGCTGTGATTCCAACGAACTGATGTTACTG  
GTTCAATAGCTTTAGCAATTGGATTTCCGTTGCAATTGGACATTTGTTTGC  
AATCAATTATACTGGAGCCAGCATGAATCCAGCTCGATCTTTTGGACCCGCA  
GTTATCATGGGAAACTGGGCAAACCACTGGATATATTGGGTTGGACCAATC  
ATGGGCGCTGTGCTGGCAGGTGCCCTTTATGAGTATGTCTTCTGTCCTGATG  
TGGAGCTCAAACGTCGCCTTAAGGAAGCCTTCAGCAAAGCCGCGCAGCAG  
ACAAAAGGGAGCTACATGGAGGTGGAGGACAACCGGAGCCAAGTGGAGA  
CGGAAGACTTGATCCTGAAGCCCGGAGTGGTGCATGTGATTGACATTGACC  
GTGGAGAAGAGAAGAAGGGGAAAGACTCTTCGGGAGAGGTATTGTCTTCC  
GTACGGGATCCCGCCACCATGGTGGAGCAAGGGCGAGGAGCTGTTCACCGG  
GGTGGTGCCCATCCTGGTCGAGCTGGACGGCGACGTAAACGGCCACAAGT  
TCAGCGTGTCCGGCGAGGGCGAGGGCGATGCCACCTACGGCAAGCTGACC  
CTGAAGTTCA

---

**Carrier name:** GV697

**Component order:** GFAP-MCS-EGFP-TK PolyA

**Cloning site:** BamHI / BamHI

**Control number:** CON517

**Carrier map:**

[https://www.genechem.com.cn/index/supports/tool\\_search.html?keywords=GV697](https://www.genechem.com.cn/index/supports/tool_search.html?keywords=GV697)

**Table S3 Resource Identifiers for antibodies**

| Antibody ID     | -                                    | AB_823664                                           | AB_2799571                                            |
|-----------------|--------------------------------------|-----------------------------------------------------|-------------------------------------------------------|
| Antibody name   | Anti-Transferrin antibody (EPR12763) | $\beta$ -Tubulin (9F3) Rabbit mAb                   | AQP4 (D1F8E) XP® Rabbit mAb                           |
| Target antigen  | Mouse                                | Mouse, Rat, Cow, Human                              | Mouse, Rat, Human                                     |
| Vendor          | Abcam                                | Cell Signaling Technology                           | Cell Signaling Technology                             |
| Cat number      | Ab278498                             | #2128                                               | #59678                                                |
| Proper Citation | Abcam Cat# ab278498                  | Cell Signaling Technology Cat# 2128, RRID:AB_823664 | Cell Signaling Technology Cat# 59678, RRID:AB_2799571 |
| Dilution        | WB: 1:1000                           | WB: 1:1000                                          | IF: 1:300                                             |
| Reference       | Reference(1)                         | References (589)                                    | Reference(5)                                          |
| Clonality       | Monoclonal antibody                  | Monoclonal antibody                                 | Monoclonal antibody                                   |
| Clone ID        | -                                    | Clone 9F3                                           | Clone D1F8E                                           |
| Host Organism   | Rabbit                               | Rabbit                                              | Rabbit                                                |
| Comments        | WB ICC<br>Flow Cyt                   | Flow Cyt, IF, IHC-P,<br>WB                          | IP, WB, IHC-P,IF                                      |

**Table S4 Resource Identifiers for antibodies**

| Antibody ID     | AB_2161028                       | AB_2099233                                           | -                                        |
|-----------------|----------------------------------|------------------------------------------------------|------------------------------------------|
| Antibody name   | Mouse/Rat CD31/PECAM-1 Antibody  | Anti-rabbit IgG, HRP-linked Antibody                 | Anti-NeuN antibody[EPR12763]-mouse IgG2a |
| Target antigen  | Mouse, Rat                       | Rabbit                                               | Mouse, Rat, Human                        |
| Vendor          | R&D systems                      | Cell Signaling Technology                            | Abcam                                    |
| Cat number      | AF3628                           | #7074                                                | Ab279296                                 |
| Proper Citation | R&D Cat# AF3628, RRID:AB_2161028 | Cell Signaling Technology Cat# 7074, RRID:AB_2099233 | Abcam Cat# ab279296                      |
| Dilution        | IF: 1:300                        | WB: 1:2000                                           | IF: 1:300                                |
| Reference       | References (147)                 | Reference(9900)                                      | Reference(0)                             |
| Clonality       | Polyclonal antibody              | Monoclonal antibody                                  | Monoclonal antibody                      |
| Clone ID        |                                  | -                                                    | -                                        |
| Host Organism   | Goat                             | Goat                                                 | Mouse                                    |
| Comments        | WB, ICC/IF, Flow                 | WB IP IHC                                            | IP, WB, ICC, IF, IHC-P                   |

**Table S5 Resource Identifiers for antibodies**

| Antibody ID         | AB_141607                                             | AB_2535792                                             | AB_2535853                                             |
|---------------------|-------------------------------------------------------|--------------------------------------------------------|--------------------------------------------------------|
| Antibody name       | Donkey anti-Mouse IgG Alexa Fluor 488                 | Donkey anti-Rabbit IgG Alexa Fluor 488                 | Donkey anti-Goat IgG Alexa Fluor 555                   |
| Target antigen      | Mouse                                                 | Rabbit                                                 | Goat                                                   |
| Vendor              | Thermo Fisher scientific                              | Thermo Fisher scientific                               | Thermo Fisher scientific                               |
| Cat number          | A-21202                                               | A-21206                                                | A-21432                                                |
| Proper Citation     | Thermo Fisher scientific Cat# A-21202, RRID:AB_141607 | Thermo Fisher scientific Cat# A-21206, RRID:AB_2535792 | Thermo Fisher scientific Cat# A-21432, RRID:AB_2535853 |
| Dilution            | IF: 1:300                                             | IF: 1:300                                              | IF: 1:300                                              |
| Reference Clonality | Reference(3099) Monoclonal antibody                   | References (4202) Monoclonal antibody                  | Reference(487) Monoclonal antibody                     |
| Clone ID            | -                                                     | -                                                      | -                                                      |
| Host Organism       | Donkey                                                | Donkey                                                 | Donkey                                                 |
| Comments            | IHC, ICC, IF                                          | ICC, IF, IHC-P                                         | ICC, IF, IHC-P                                         |

**Figure S1**

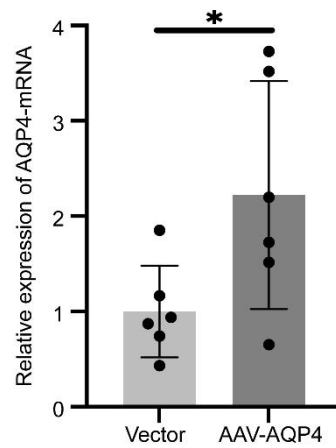

**Figure S1. qPCR revealed that AQP4 mRNA expression in AAV-AQP4 group was higher compared with the vector group.** The expression level of AQP4-mRNA (NM\_009700.3) after AAV-AQP4 treatment were detected by qPCR analyses. n = 6 per group. Data are the mean  $\pm$  standard deviation (SD). (t-test  $t=2.320$ , \*  $P = 0.0427$ ).

**Figure S2**

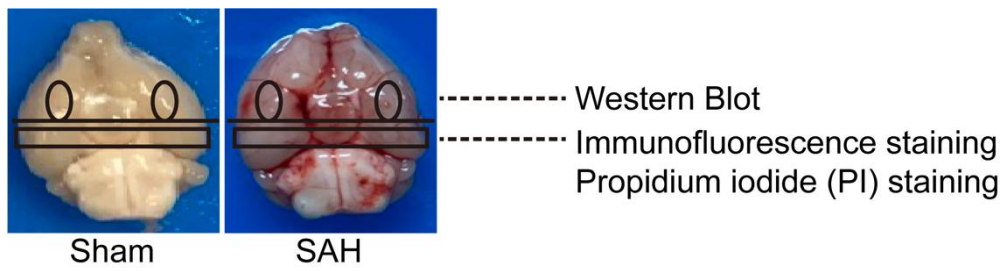

**Figure S2. Schematic diagram of whole brain pictures and sampling sites of sham group and SAH group.** The brain tissues were collected from the base of the temporal lobe and stored immediately  $-80^{\circ}\text{C}$  for Western Blot. Coronal brain sections containing the basal temporal lobe were used for PI staining.
