# Supplementary figures and images for: El Tribunal del Cannabis desnuda al emperador
Source: Hindawi journal article supplement (doi:10.1155/2022/8808677), 2009-01-01

Western blot related to Figure 1C

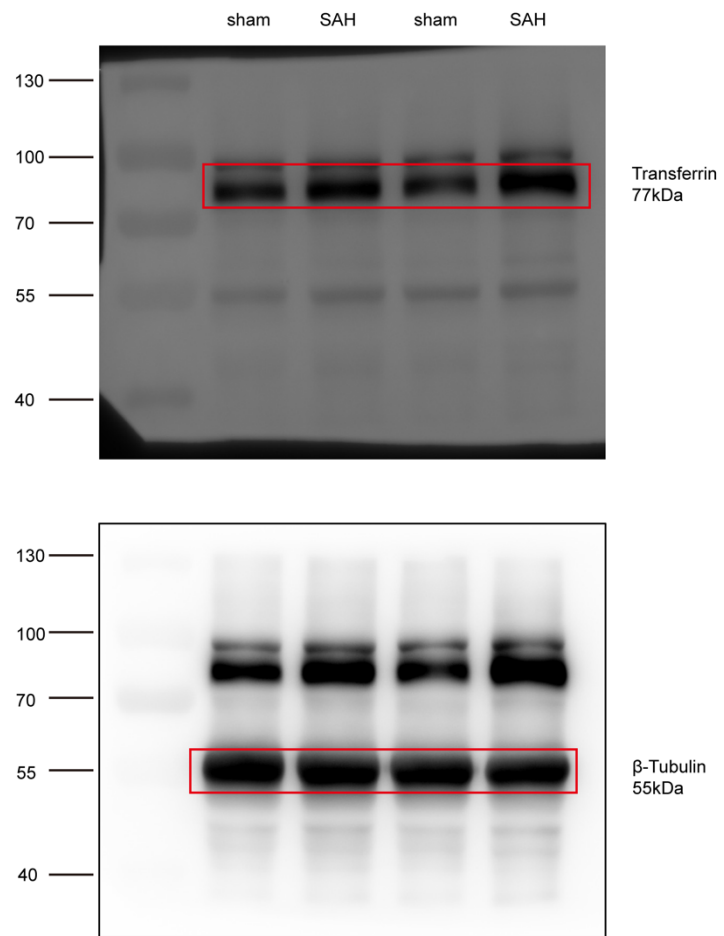

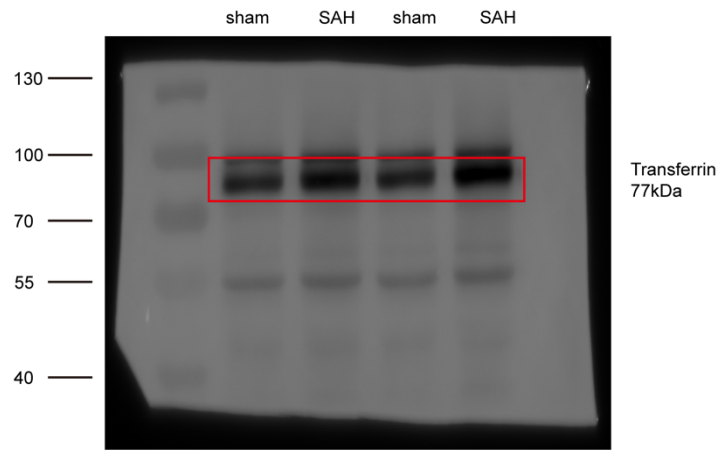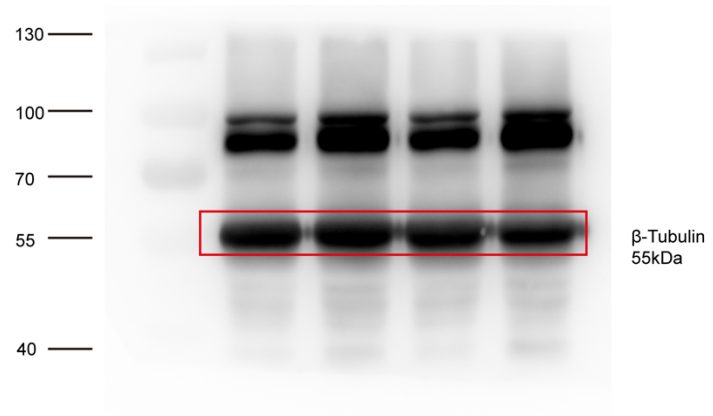

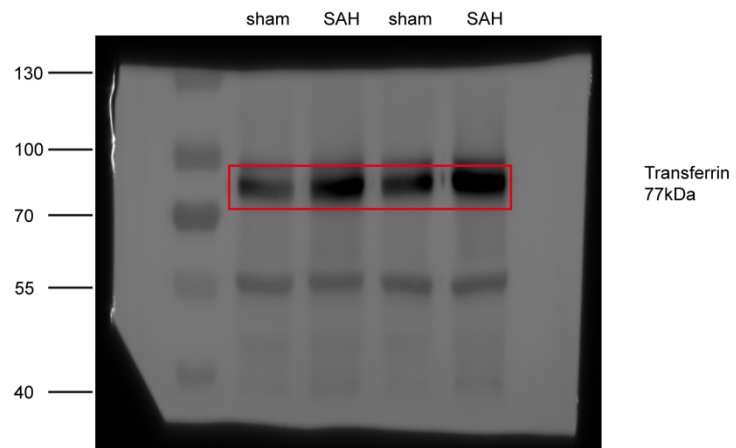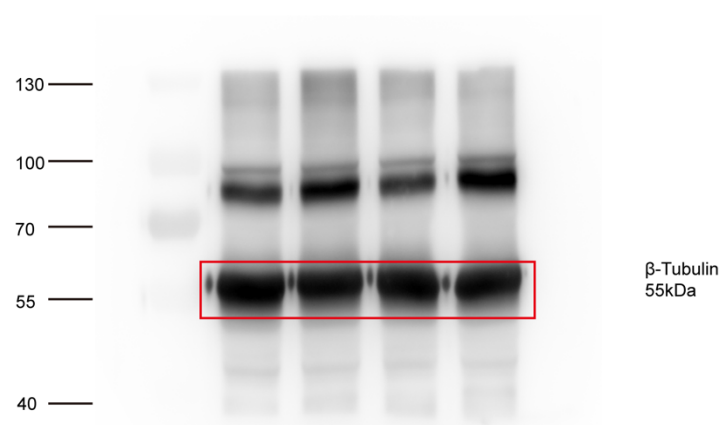

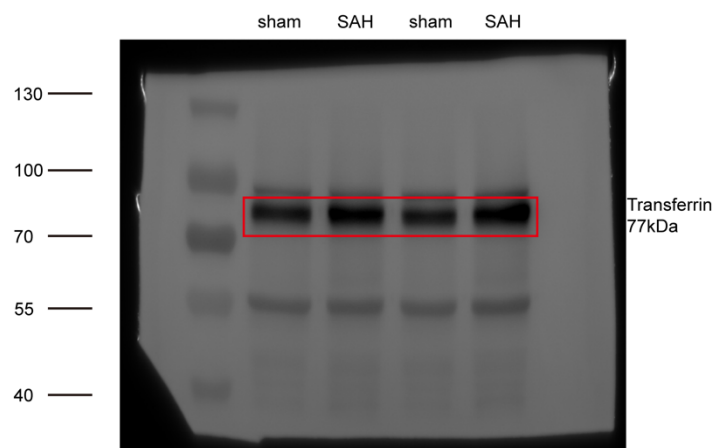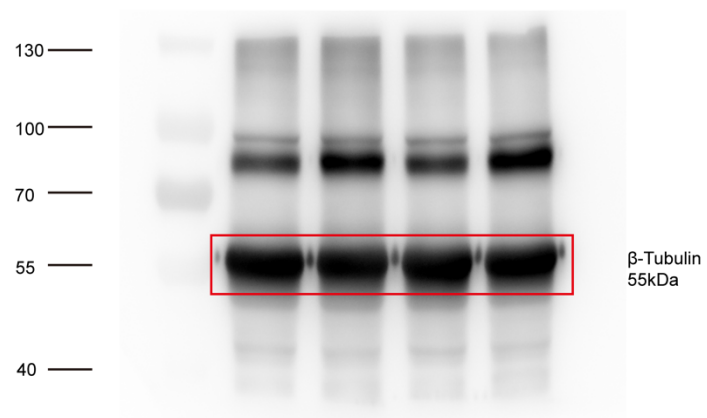

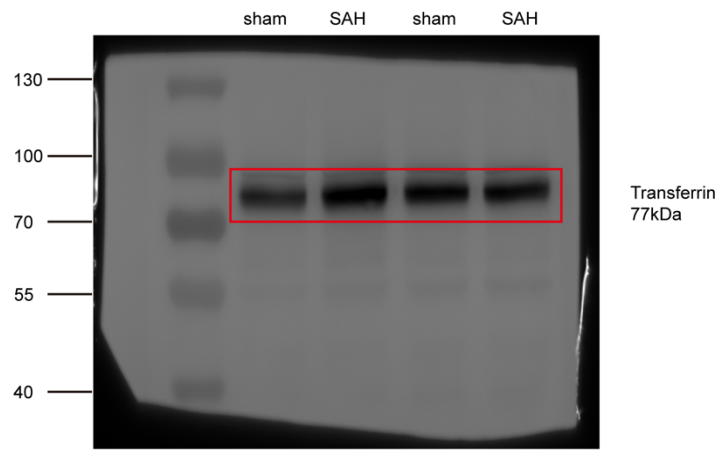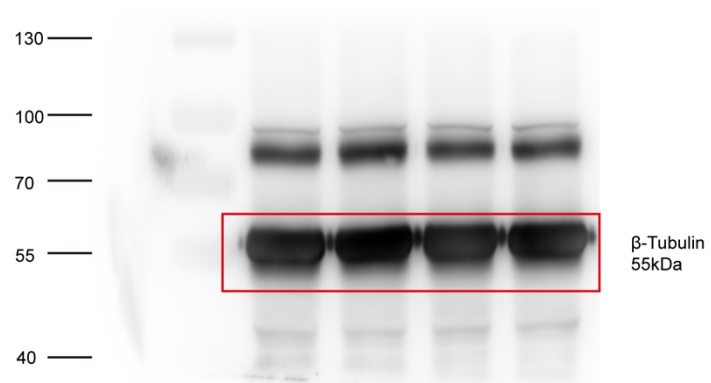

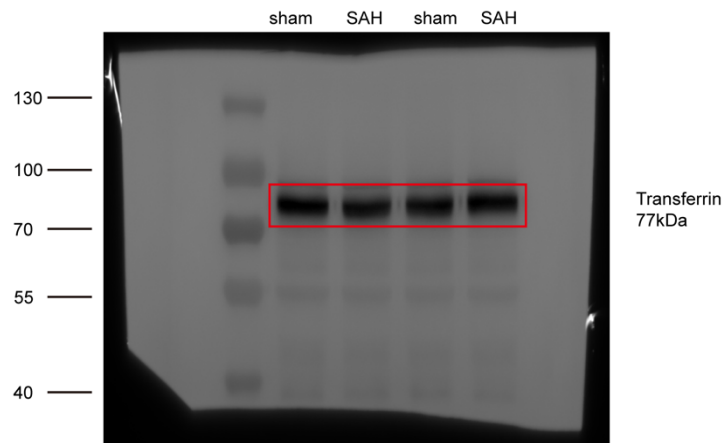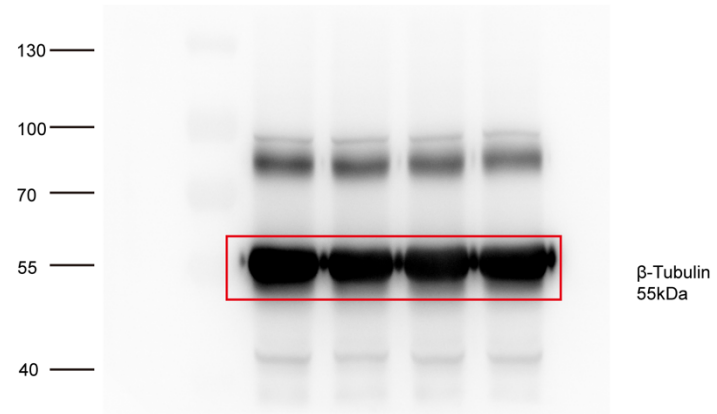

Western blot related to Figure 3C

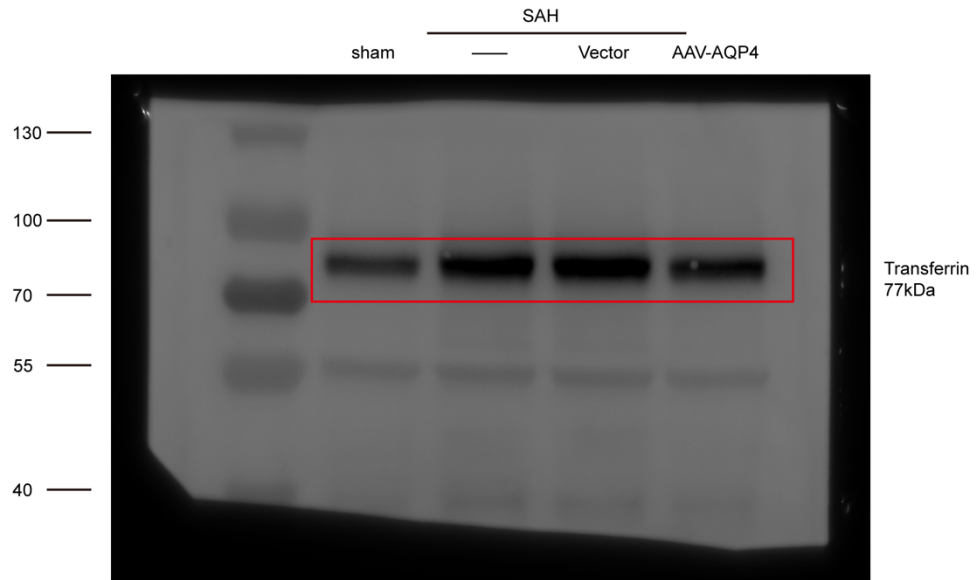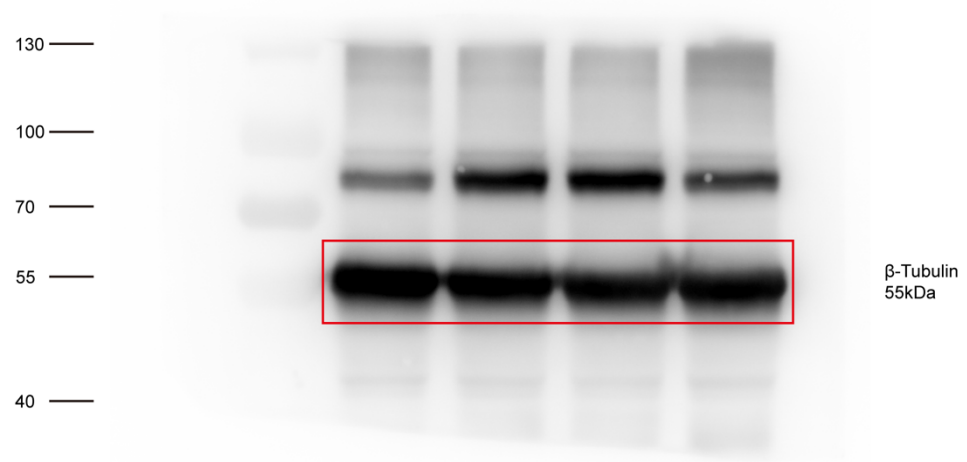

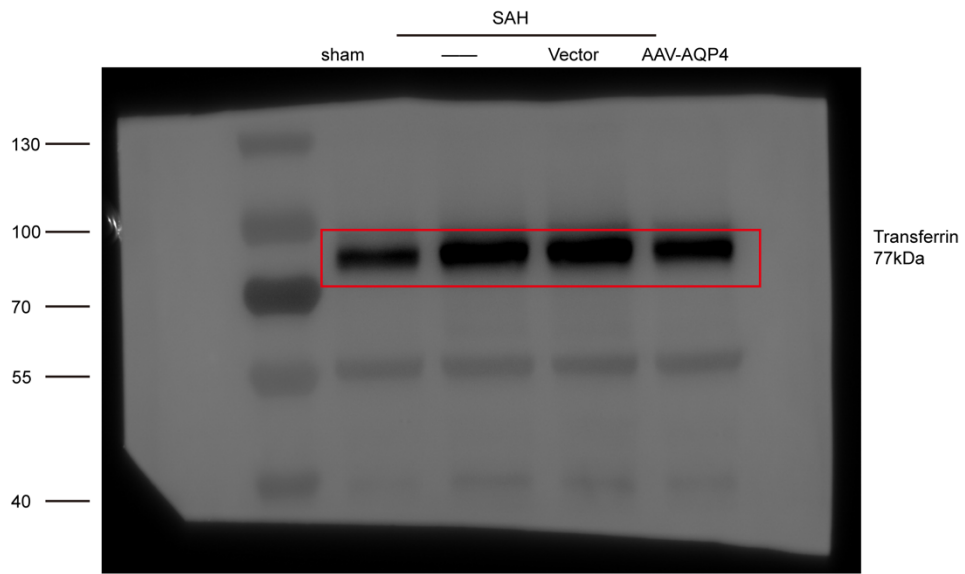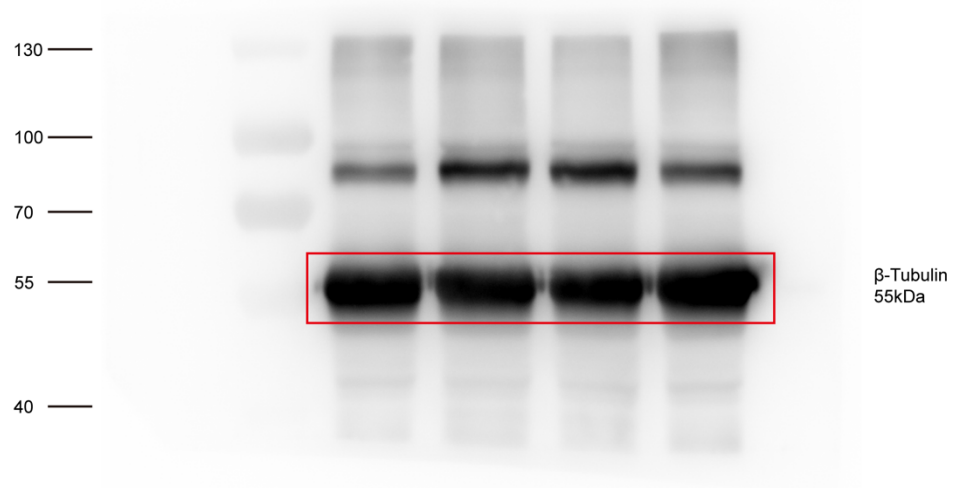



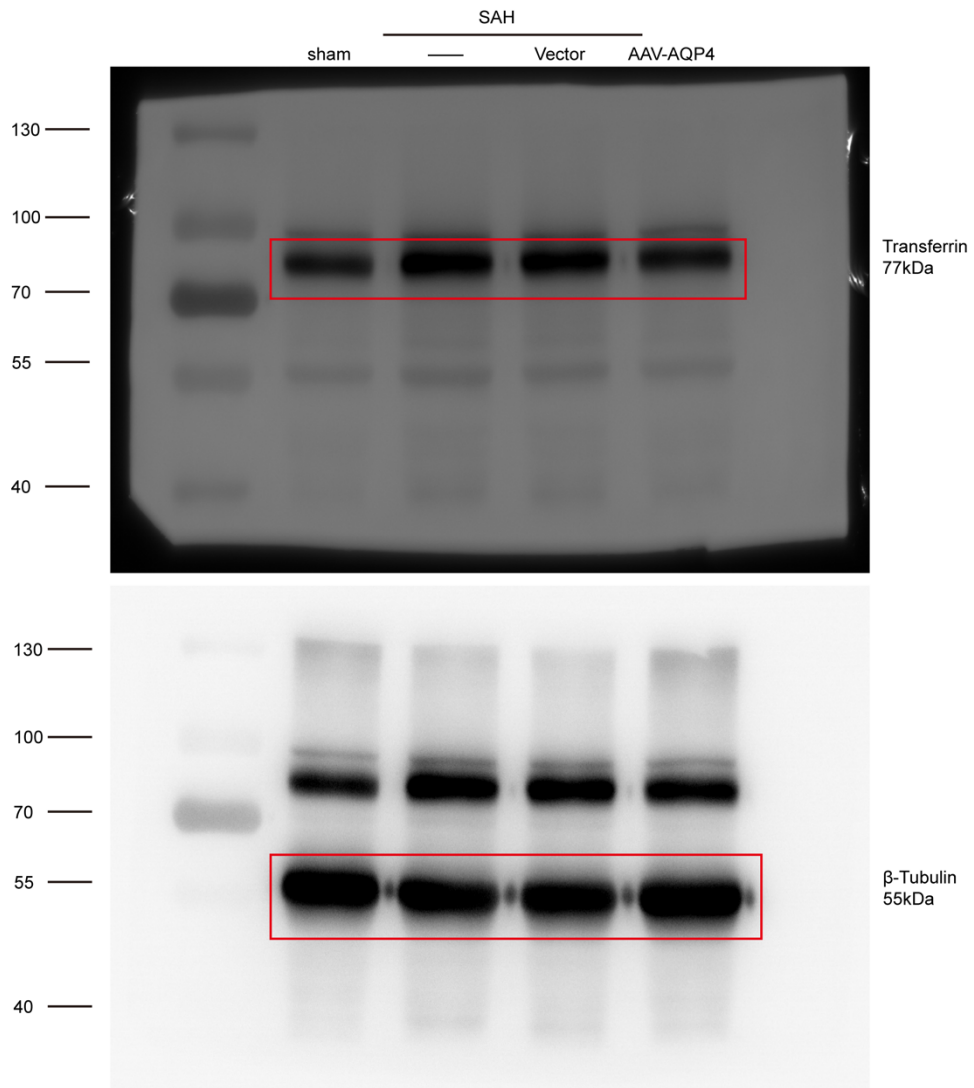

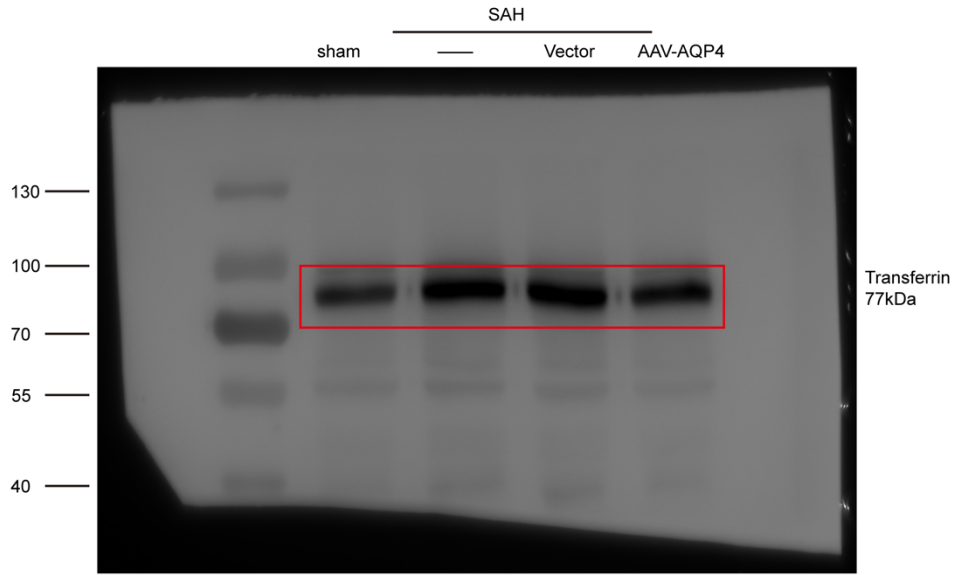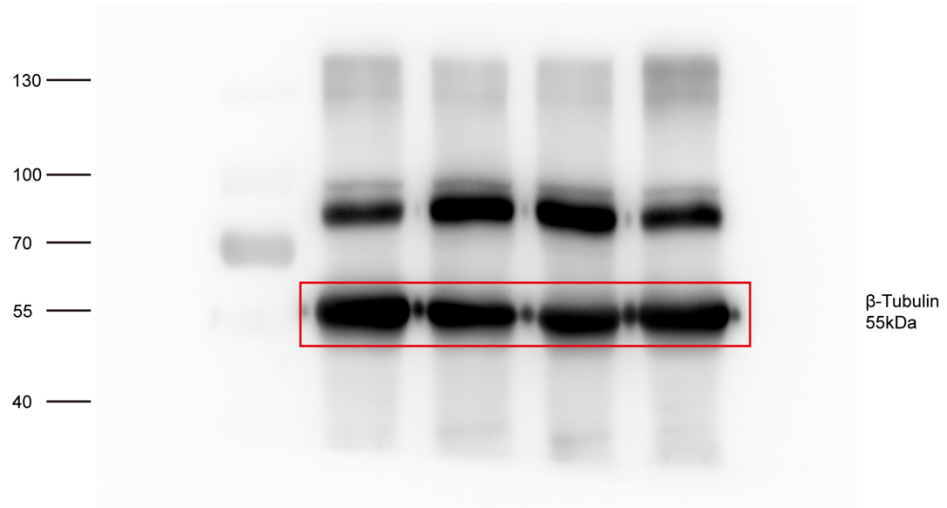

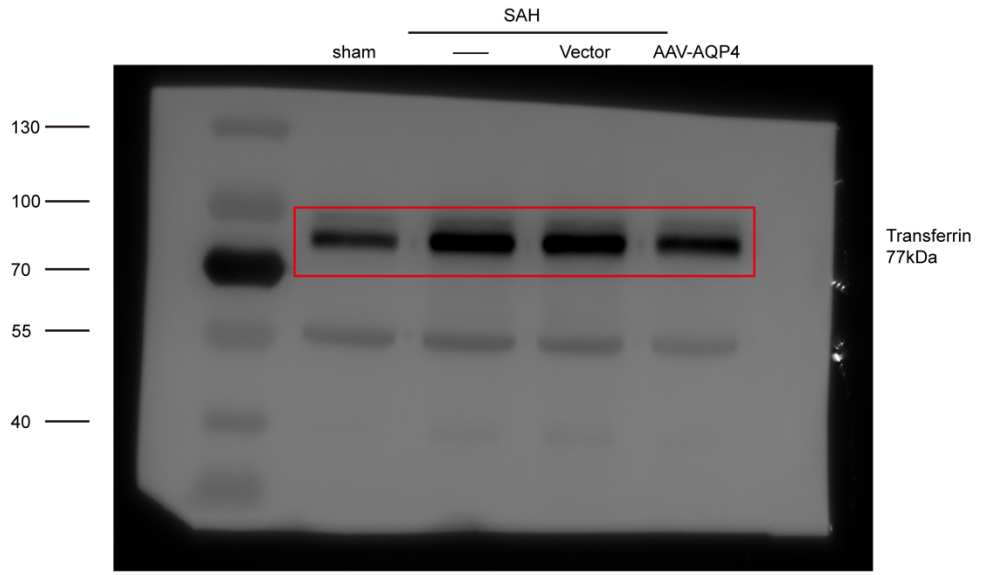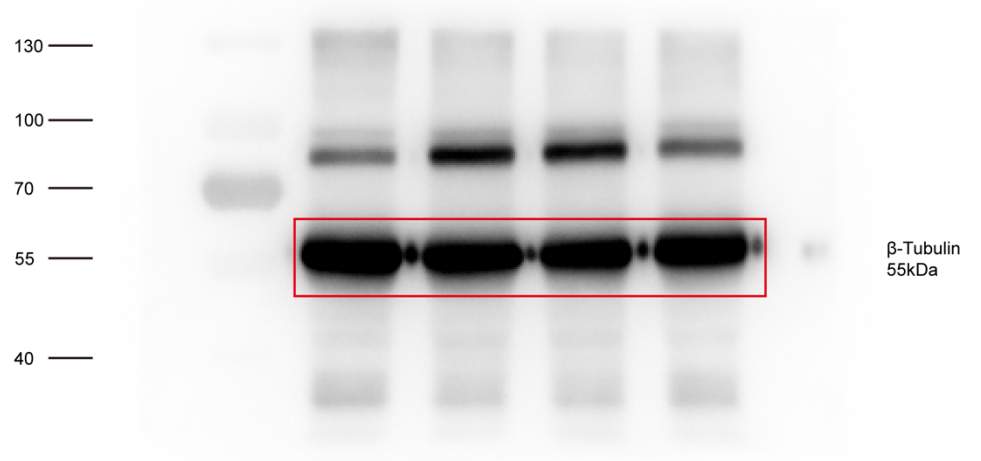

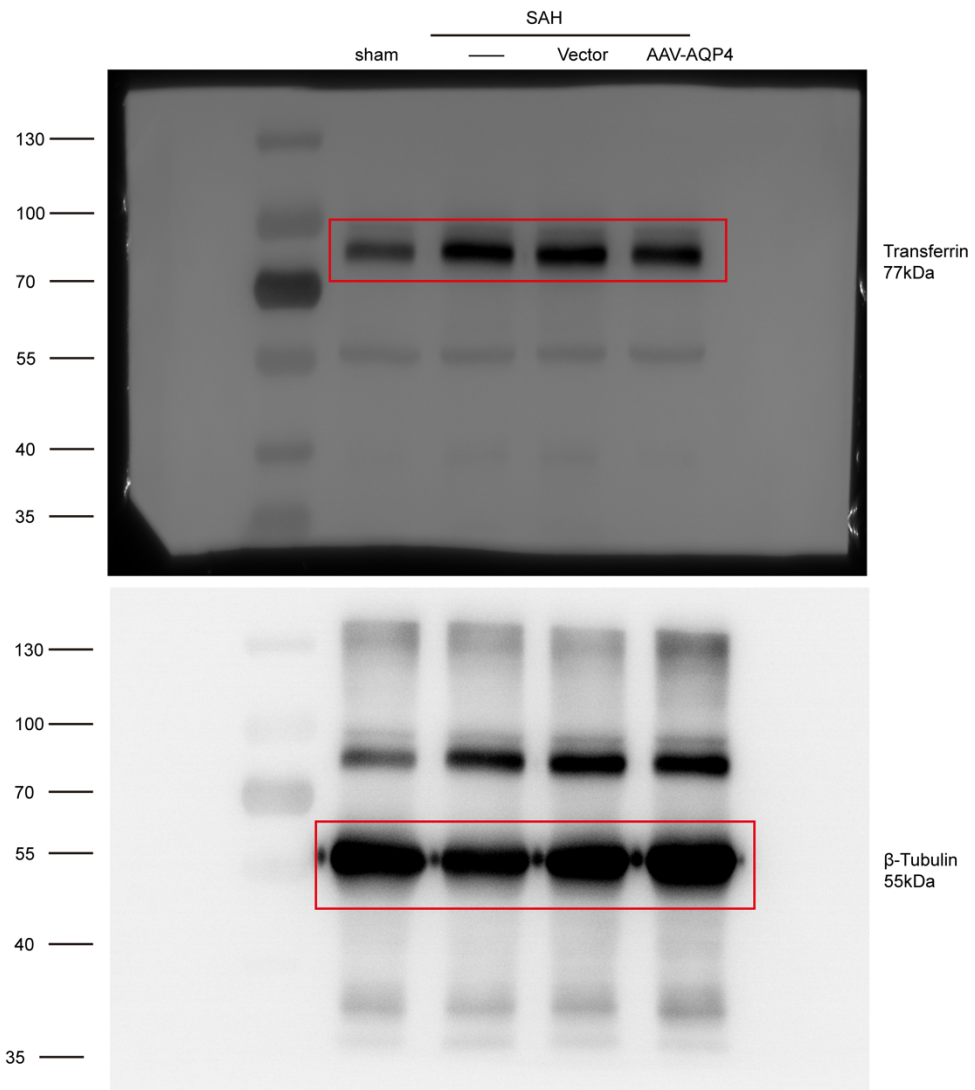

Supplement: f2 [file 8808677.f2.pdf]
